# Supplementary material for: The Prognostic Role of the Surgical Margins in Squamous Vulvar Cancer: A Retrospective Australian Study
Source: PubMed Central journal article supplement (PMC7697402; doi:10.3390/cancers12113375), 2020-11-14
Supplement: cancers-12-03375-s001.pdf [file cancers-12-03375-s001.pdf]

Article

# Supplementary Material: The Prognostic Role of the Surgical Margins in Squamous Vulvar Cancer: a Retrospective Australian Study

Ellen L Barlow <sup>1\*</sup>, Michael Jackson <sup>2,3</sup> and Neville F Hacker <sup>1,4</sup>

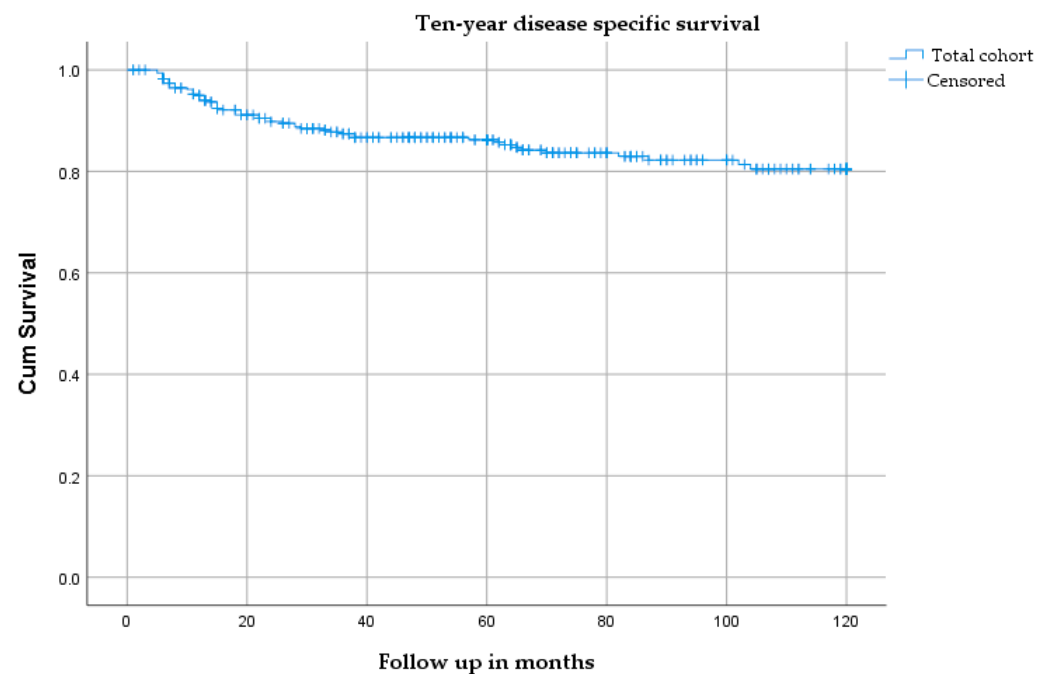

**Figure S1.** Kaplan-Meier curve for ten-year disease specific survival for the whole study cohort (n = 345).

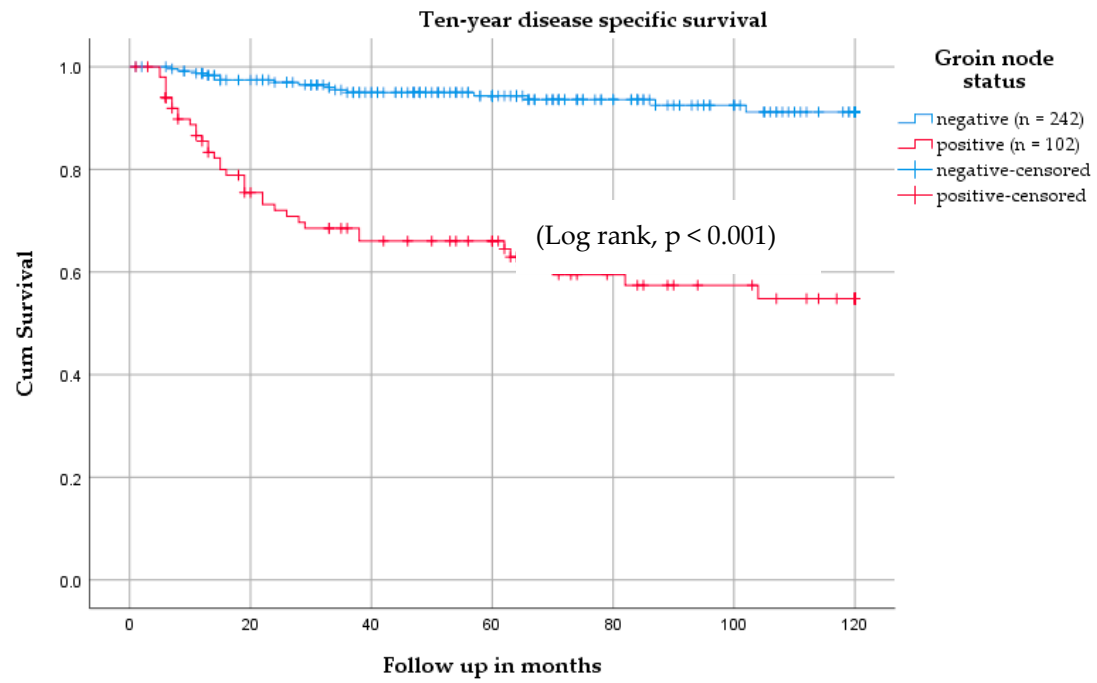

**Figure S2.** Kaplan-Meier curve for ten-year disease-specific survival stratified by nodal status.

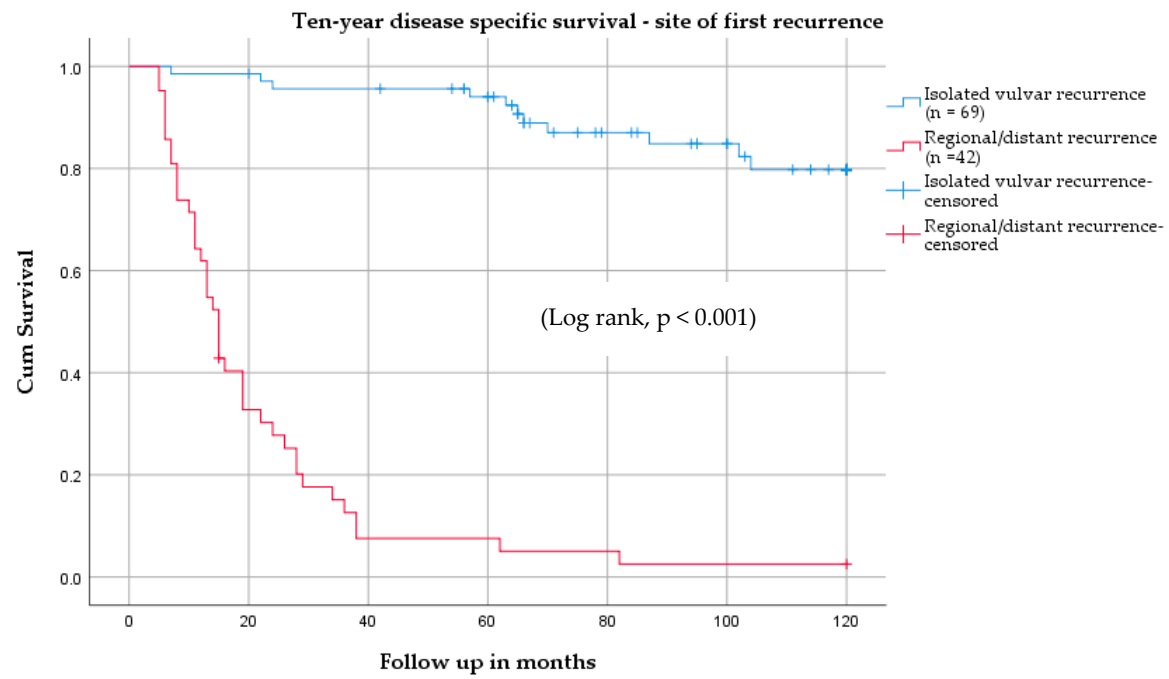

**Figure S3.** Kaplan-Meier curve for ten-year disease specific survival stratified by site of first recurrence.

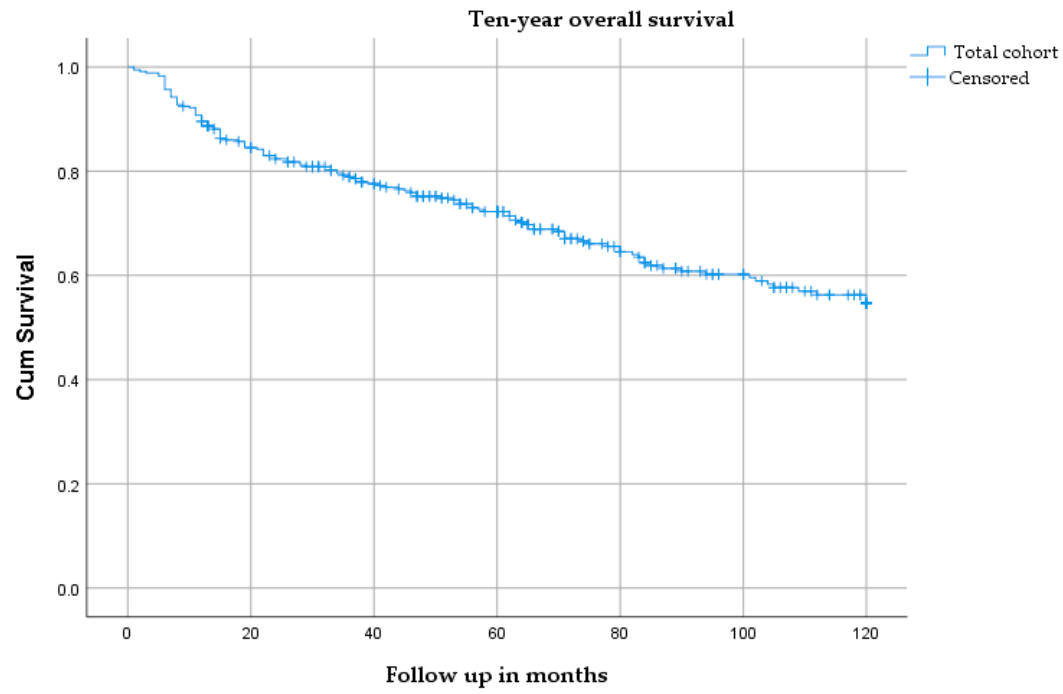

Figure S4. Kaplan-Meier curve for ten-year overall survival for the total study cohort (n = 345).

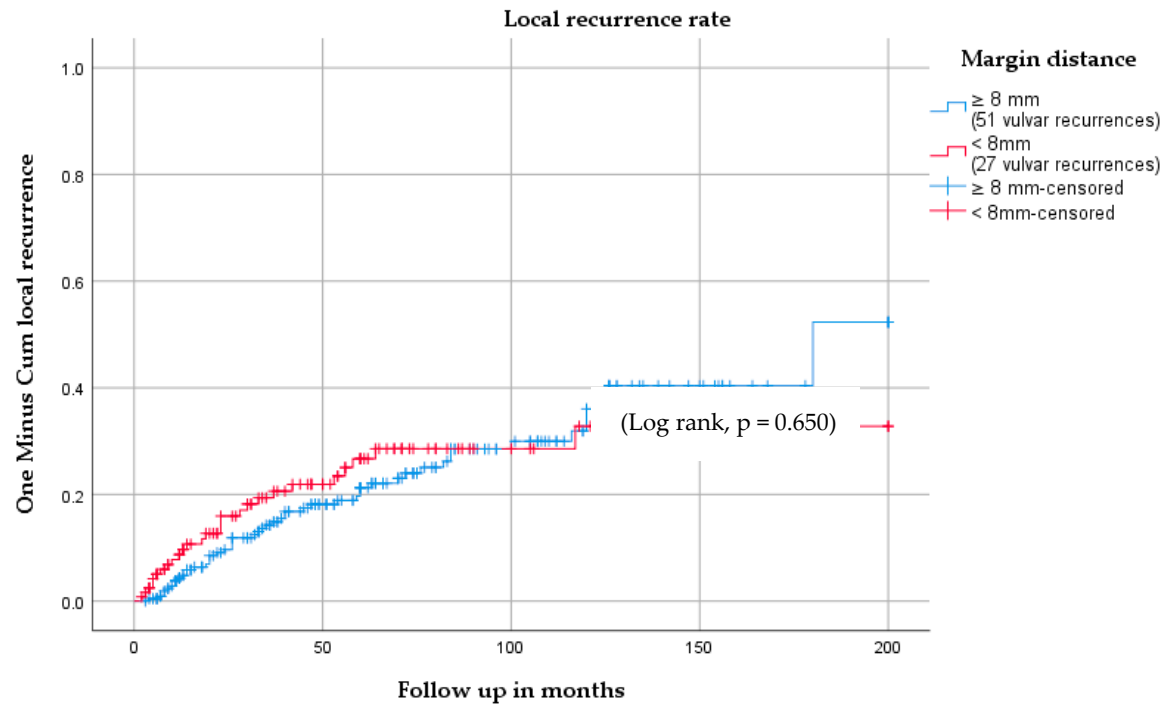

| Months        | 0   | 20  | 40  | 60  | 80 | 100 | 120 | 180 |                |
|---------------|-----|-----|-----|-----|----|-----|-----|-----|----------------|
| < 8 mm margin | 122 | 85  | 62  | 44  | 27 | 20  | 15  | 3   | Number at risk |
| ≥ 8 mm margin | 219 | 172 | 131 | 102 | 68 | 49  | 33  | 5   |                |

Figure S5. Local recurrence rate in 219 patients with margins ≥ 8 mm and in 122 patients with margins < 8 mm.

**Table S1.** Margin distance and treatment of positive or close margins to incidence and site of vulvar recurrence.

| Margin distance                   | Total n | Vulvar recurrence n (%) | P value <sup>a</sup> | Primary site recurrence (n =33) | Remote site <sup>b</sup> recurrence (n = 45) |
|-----------------------------------|---------|-------------------------|----------------------|---------------------------------|----------------------------------------------|
| *Positive margin                  | 11      | 2 (18.2%)               |                      |                                 |                                              |
| - treated with radiotherapy       | 8       | 2 (25%)                 |                      | 2                               | 0                                            |
| - treated with re-excision        | 3       | 0 (0%)                  | 0.157                |                                 |                                              |
| Close margins                     |         |                         |                      |                                 |                                              |
| 0.1 mm – 4.9 mm treated margins   | 23      | 1 (4.3%)                |                      |                                 |                                              |
| 0.1 mm – 4.9 mm untreated margins | 25      | 10 (40%)                | 0.003                |                                 |                                              |
| - treated with radiotherapy       | 14      | 0 (0%)                  |                      |                                 |                                              |
| - untreated margins               | 25      | 10 (40%)                | 0.009                | 11                              | 0                                            |
| - treated with re-excision        | 9       | 1 (11.1%)               |                      |                                 |                                              |
| - untreated margins               | 25      | 10 (40%)                | 0.095                |                                 |                                              |
| 5 mm – 7.9 mm treated margins     | 12      | 1 (8.3%)                |                      |                                 |                                              |
| 5 mm – 7.9 mm untreated margins   | 51      | 13 (25.5%)              | 0.165                |                                 |                                              |
| - treated with radiotherapy       | 9       | 1 (11.1%)               |                      |                                 |                                              |
| - untreated margins               | 51      | 13 (25.5%)              | 0.352                |                                 |                                              |
| - treated with re-excision        | 3       | 0 (0%)                  |                      | 13                              | 1                                            |
| - untreated margins               | 51      | 13 (25.5%)              | 0.252                |                                 |                                              |
| < 8 mm treated margins            | 76      | 23 (30.2%)              |                      |                                 |                                              |
| < 8 mm untreated margins          | 46      | 4 (8.7%)                | 0.005                |                                 |                                              |
| Wide margins                      |         |                         |                      |                                 |                                              |
| ≥ 8 mm margins                    | 219     | 51 (23.3%)              |                      | 7                               | 44                                           |

\*All positive margins treated with either radiotherapy or re-excision. <sup>a</sup>Log-rank test. <sup>b</sup>no remote site recurrences in positive, or 0.1 - 4.9 mm margins.

**Table S2.** Breakdown of vulvar recurrence per mm margin distance in 25 patients with untreated margins < 5 mm.

| <b>Margin distance</b> | <b>Number</b> | <b>Local recurrence</b> |
|------------------------|---------------|-------------------------|
| 1 mm                   | 2             | 0 (0%)                  |
| 2 mm                   | 4             | 1 (4%)                  |
| 3 mm                   | 5             | 3 (12%)                 |
| 4 mm                   | 14            | 6 (24%)                 |
| Total                  | 25            | 10 (40%)                |

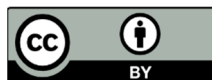

© 2020 by the authors. Licensee MDPI, Basel, Switzerland. This article is an open access article distributed under the terms and conditions of the Creative Commons Attribution (CC BY) license (<http://creativecommons.org/licenses/by/4.0/>).
